# Supplementary material for: Clinical course and outcomes of diagnosing Inflammatory Bowel Disease in children 10 years and under: retrospective cohort study from two tertiary centres in the United Kingdom and in Italy
Source: Springer Nature journal article supplement (doi:10.1186/s12876-016-0455-y), 2016-03-15
Supplement: MOESM2 [file 9738530]

**Supplementary Table S2. Multiple logistic regression analysis comparing Group A (age at diagnosis 5-10 years) and Group B (age at diagnosis ≥ 11 years). A) Analysis conducted irrespective of the country of origin. B) Analysis conducted considering the country of origin (United Kingdom, Italy).**

**A)**

|                                                    |                                              | Disease phenotype at dg <sup>a</sup> |                     |              | Disease outcomes |        |       | All variables |              |              |
|----------------------------------------------------|----------------------------------------------|--------------------------------------|---------------------|--------------|------------------|--------|-------|---------------|--------------|--------------|
|                                                    |                                              | OR <sup>b</sup>                      | CI <sup>c</sup> 95% |              | OR               | CI 95% |       | OR            | CI 95%       |              |
| Diagnosis                                          | CD <sup>d</sup> + IBD-U <sup>e</sup> CD-like | ref. <sup>6</sup>                    |                     |              | ref.             |        |       | ref.          |              |              |
|                                                    | UC <sup>d</sup> + IBD-U UC-like              | 0.467                                | 0.192               | 1.138        | 1.190            | 0.614  | 2.306 | 0.553         | 0.217        | 1.410        |
| Time onset - dg (yrs <sup>g</sup> )                |                                              | 0.923                                | 0.568               | 1.501        |                  |        |       | 0.942         | 0.561        | 1.583        |
| Moderate to severe abdo <sup>h</sup> pain at dg    | NO                                           | ref.                                 |                     |              |                  |        |       | ref.          |              |              |
|                                                    | YES                                          | 1.026                                | 0.326               | 3.234        |                  |        |       | 1.307         | 0.399        | 4.283        |
| Wt <sup>10</sup> loss at dg                        | NO                                           | ref.                                 |                     |              |                  |        |       | ref.          |              |              |
|                                                    | YES                                          | 0.686                                | 0.325               | 1.449        |                  |        |       | 0.647         | 0.296        | 1.412        |
| Nocturnal symptoms at dg                           | NO                                           | ref.                                 |                     |              |                  |        |       | ref.          |              |              |
|                                                    | YES                                          | 1.607                                | 0.677               | 3.812        |                  |        |       | 1.542         | 0.618        | 3.846        |
| Anemia at dg                                       | NO                                           | ref.                                 |                     |              |                  |        |       | ref.          |              |              |
|                                                    | YES                                          | 0.768                                | 0.363               | 1.623        |                  |        |       | 0.825         | 0.377        | 1.802        |
| Joint pain at dg                                   | NO                                           | ref.                                 |                     |              |                  |        |       | ref.          |              |              |
|                                                    | YES                                          | 1.450                                | 0.616               | 3.413        |                  |        |       | 1.411         | 0.582        | 3.420        |
| Albumin at dg                                      |                                              | 1.034                                | 0.964               | 1.110        |                  |        |       | 1.027         | 0.952        | 1.107        |
| CRP <sup>11</sup> at dg                            |                                              | 0.996                                | 0.979               | 1.013        |                  |        |       | 0.991         | 0.972        | 1.009        |
| ESR <sup>12</sup> at dg                            |                                              | 1.005                                | 0.989               | 1.021        |                  |        |       | 1.004         | 0.987        | 1.021        |
| <b>PCDAI<sup>13</sup>/PUCAI<sup>14</sup> at dg</b> |                                              | <b>1.040</b>                         | <b>1.008</b>        | <b>1.074</b> |                  |        |       | <b>1.044</b>  | <b>1.010</b> | <b>1.080</b> |
| PCDAI/PUCAI at follow-up                           |                                              |                                      |                     |              | 0.975            | 0.945  | 1.007 | 0.967         | 0.932        | 1.003        |
| Relapses / pt <sup>15</sup> / yr                   |                                              |                                      |                     |              | 1.139            | 0.764  | 1.697 | 1.045         | 0.875        | 1.619        |
| Endoscopies / pt / yr                              |                                              |                                      |                     |              | 1.493            | 0.712  | 3.130 | 1.674         | 0.769        | 4.188        |
| Early treatment with Thiopurines                   | NO                                           |                                      |                     |              | ref.             |        |       | ref.          |              |              |
|                                                    | YES                                          |                                      |                     |              | 1.341            | 0.672  | 2.677 | 1.862         | 0.900        | 4.332        |

**B)**

|                                  |                    | Disease phenotype at dg |              |              | Disease outcomes |        |       | All variables |              |              |
|----------------------------------|--------------------|-------------------------|--------------|--------------|------------------|--------|-------|---------------|--------------|--------------|
|                                  |                    | OR                      | CI 95%       |              | OR               | CI 95% |       | OR            | CI 95%       |              |
| Diagnosis                        | CD + IBD-U CD-like | ref.                    |              |              | ref.             |        |       | ref.          |              |              |
|                                  | UC + IBD-U UC-like | 0.457                   | 0.186        | 1.123        | 1.179            | 0.606  | 2.294 | 0.550         | 0.214        | 1.412        |
| Time onset - dg (yrs)            |                    | 0.922                   | 0.565        | 1.504        |                  |        |       | 0.927         | 0.547        | 1.569        |
| Moderate to severe abdo pain     | NO                 | ref.                    |              |              |                  |        |       | ref.          |              |              |
|                                  | YES                | 1.100                   | 0.341        | 3.546        |                  |        |       | 1.378         | 0.413        | 4.599        |
| Wt loss                          | NO                 | ref.                    |              |              |                  |        |       | ref.          |              |              |
|                                  | YES                | 0.707                   | 0.333        | 1.500        |                  |        |       | 0.670         | 0.305        | 1.473        |
| Nocturnal symptoms               | NO                 | ref.                    |              |              |                  |        |       | ref.          |              |              |
|                                  | YES                | 1.786                   | 0.734        | 4.349        |                  |        |       | 1.725         | 0.674        | 4.415        |
| Anemia                           | NO                 | ref.                    |              |              |                  |        |       | ref.          |              |              |
|                                  | YES                | 0.845                   | 0.391        | 1.826        |                  |        |       | 0.943         | 0.419        | 2.124        |
| Joint pain                       | NO                 | ref.                    |              |              |                  |        |       | ref.          |              |              |
|                                  | YES                | 1.564                   | 0.652        | 3.752        |                  |        |       | 1.498         | 0.611        | 3.673        |
| Albumin                          |                    | 1.026                   | 0.955        | 1.103        |                  |        |       | 1.014         | 0.937        | 1.096        |
| CRP                              |                    | 0.996                   | 0.979        | 1.014        |                  |        |       | 0.992         | 0.973        | 1.011        |
| ESR                              |                    | 1.002                   | 0.985        | 1.019        |                  |        |       | 1.001         | 0.983        | 1.019        |
| <b>PCDAI/PUCAI at dg</b>         |                    | <b>1.041</b>            | <b>1.009</b> | <b>1.075</b> |                  |        |       | <b>1.090</b>  | <b>1.020</b> | <b>1.100</b> |
| PCDAI/PUCAI at follow-up         |                    |                         |              |              | 0.975            | 0.944  | 1.006 | 0.963         | 0.928        | 1.000        |
| Relapses / pt / yr               |                    |                         |              |              | 1.144            | 0.864  | 1.714 | <b>1.200</b>  | <b>1.010</b> | <b>1.650</b> |
| Endoscopies / pt / yr            |                    |                         |              |              | 1.502            | 0.814  | 3.158 | <b>1.670</b>  | <b>1.015</b> | <b>4.190</b> |
| Early treatment with Thiopurines | NO                 |                         |              |              | ref.             |        |       | ref.          |              |              |
|                                  | YES                |                         |              |              | 1.341            | 0.872  | 2.774 | <b>1.862</b>  | <b>1.020</b> | <b>4.330</b> |
| Country                          | Great Britain      | 0.626                   | 0.266        | 1.473        | 0.909            | 0.442  | 1.870 | 0.535         | 0.196        | 1.456        |
|                                  | Italy              | ref.                    |              |              | ref.             |        |       | ref.          |              |              |

- <sup>1</sup> dg: diagnosis;
- <sup>2</sup> OR: Odds ratio;
- <sup>3</sup> CI: Confidence Interval;
- <sup>4</sup> CD: Crohn's disease;
- <sup>5</sup> IBD-U: Inflammatory Bowel Disease Unclassified;
- <sup>6</sup> ref.: reference;
- <sup>7</sup> UC: ulcerative colitis;
- <sup>8</sup> yr(s): year(s);
- <sup>9</sup> abdo: abdominal;
- <sup>10</sup> Wt: weight;
- <sup>11</sup> CRP: C-reactive protein;
- <sup>12</sup> ESR: erythrocyte sedimentation rate;
- <sup>13</sup> PCDAI: Paediatric Crohn's Disease Activity Index;
- <sup>14</sup> PUCAI: Paediatric Ulcerative Colitis Activity Index;
- <sup>15</sup> pt: patient.
